# Supplementary material for: Loss of Smad4 promotes aggressive lung cancer metastasis by de-repression of PAK3 via miRNA regulation
Source: PubMed Central journal article supplement (PMC8357888; doi:10.1038/s41467-021-24898-9), 2021-08-11
Supplement: 41467_2021_24898_MOESM3_ESM.pdf [file 41467_2021_24898_MOESM3_ESM.pdf]

1           **Description of Additional Supplementary Files of the manuscript entitled**  
2           **“Loss of Smad4 promotes aggressive lung cancer metastasis by de-repression**  
3           **of PAK3 via miRNA regulation”**

4

5   File Name: Supplementary Data 1

6   Description: It includes the differentially expressed genes DEGs between SPK cells  
7   and PK cells.

8

9   File Name: Supplementary Data 2

10   Description: It includes the top enriched human diseases by the KEGG analysis of  
11   DEGs listed in Supplementary Data 1.

12

13   File Name: Supplementary Data 3

14   Description: It includes the top enriched cellular processes by the KEGG analysis of  
15   DEGs listed in Supplementary Data 1.

16

17   File Name: Supplementary Data 4

18   Description: It includes that DEGs, listed in Supplementary Data 1, are related to  
19   cancer and cell motility.

20

21   File Name: Supplementary Data 5

22   Description: It is the summary of lung cancer metastasis in PK &SPK mice.

23

24   File Name: Supplementary Data 6

25   Description: It is the summary of SMAD4 mutation in the MSK-IMPACT datasets.

26

27   File Name: Supplementary Data 7

28   Description: It is the summary of lung cancer patients who have triple mutations in  
29   KRAS, TP53, and SMAD4.

30

31   File Name: Supplementary Data 8

32   Description: It is the summary of patient information of Figure 7.

33

34   File Name: Supplementary Data 9

35   Description: It is the summary of patient information of Sup. Fig. 9c.

36
